# Supplementary material
Source: publisher figshare collection journal article supplement (https://acs.figshare.com/ndownloader/files/5692083)
Supplement: Supplementary file 1 [file 5692083]

# ic010816g.cif

data_global


# 1. SUBMISSION DETAILS

_publ_contact_author

;

       Dr. Kenneth D Karlin

       Department of Chemistry

       Johns Hopkins University

       Baltimore, MD 21218

       USA

;

_publ_contact_author_phone    '+410 516 8027'


_publ_contact_author_fax '+410 516 8420'


_publ_contact_author_email    karlin@jhu.edu


_publ_requested_journal       'Inorganic Chemistry'


# 2. TITLE AND AUTHOR LIST


_publ_section_title

; A Bis-Acetonitrile Two-Coordinate Copper(I) Complex: Synthesis and
Characterization

of Highly Soluble B(C6F5)4- Salts of [Cu(MeCN)2]+ and [Cu(MeCN)4]+

;


loop_

_publ_author_name

_publ_author_address

'Liang, H-C.'

;

       Department of Chemistry

       Johns Hopkins University

       Baltimore, MD 21218

;

'Incarvito, C. D.'

;

       University of Delaware

       Department of Chemistry and Biochemistry

       Newark, DE 19716

;

'Rheingold, A. L.'

;

       University of Delaware

       Department of Chemistry and Biochemistry

       Newark, DE 19716

;

'Karlin, K. D.'

;

       Department of Chemistry

       Johns Hopkins University

       Baltimore, MD 21218

;


# 3. Results


data_kdk43


_audit_creation_method            SHELXL-97

_chemical_name_systematic

;

   ?

;

_chemical_name_common             ?

_chemical_melting_point           ?

_chemical_formula_moiety          ?

_chemical_formula_sum

   'C28 H6 B Cu F20 N2'

_chemical_formula_weight          824.70


loop_

   _atom_type_symbol

   _atom_type_description

   _atom_type_scat_dispersion_real

   _atom_type_scat_dispersion_imag

   _atom_type_scat_source

   'C'  'C'   0.0033   0.0016

   'International Tables Vol C Tables 4.2.6.8 and 6.1.1.4'

   'H'  'H'   0.0000   0.0000

   'International Tables Vol C Tables 4.2.6.8 and 6.1.1.4'

   'B'  'B'   0.0013   0.0007

   'International Tables Vol C Tables 4.2.6.8 and 6.1.1.4'

   'N'  'N'   0.0061   0.0033

   'International Tables Vol C Tables 4.2.6.8 and 6.1.1.4'

   'F'  'F'   0.0171   0.0103

   'International Tables Vol C Tables 4.2.6.8 and 6.1.1.4'

   'Cu'  'Cu'   0.3201   1.2651

   'International Tables Vol C Tables 4.2.6.8 and 6.1.1.4'


_symmetry_cell_setting            Monoclinic

_symmetry_space_group_name_H-M    C2/c


loop_

   _symmetry_equiv_pos_as_xyz

   'x, y, z'

   '-x, y, -z+1/2'

   'x+1/2, y+1/2, z'

   '-x+1/2, y+1/2, -z+1/2'

   '-x, -y, -z'

   'x, -y, z-1/2'

   '-x+1/2, -y+1/2, -z'

   'x+1/2, -y+1/2, z-1/2'


_cell_length_a                    19.7183(16)

_cell_length_b                    8.2444(7)

_cell_length_c                    19.8057(16)

_cell_angle_alpha                 90.00

_cell_angle_beta                  118.2620(10)

_cell_angle_gamma                 90.00

_cell_volume                      2835.9(4)

_cell_formula_units_Z             4

_cell_measurement_temperature     173(2)

_cell_measurement_reflns_used     ?

_cell_measurement_theta_min       ?

_cell_measurement_theta_max       ?


_exptl_crystal_description        rod

_exptl_crystal_colour             colorlss

_exptl_crystal_size_max           0.20

_exptl_crystal_size_mid           0.20

_exptl_crystal_size_min           0.15

_exptl_crystal_density_meas       ?

_exptl_crystal_density_diffrn     1.932

_exptl_crystal_density_method     'not measured'

_exptl_crystal_F_000              1608

_exptl_absorpt_coefficient_mu     0.928

_exptl_absorpt_correction_type    'Empirical from SADABS'

_exptl_absorpt_correction_T_min   0.8361

_exptl_absorpt_correction_T_max   0.8733

_exptl_absorpt_process_details    ?


_exptl_special_details

;

   ?

;


_diffrn_ambient_temperature       173(2)

_diffrn_radiation_wavelength      0.71073

_diffrn_radiation_type            MoK\a

_diffrn_radiation_source          'fine-focus sealed tube'

_diffrn_radiation_monochromator   graphite

_diffrn_measurement_device_type   'CCD area detector'

_diffrn_measurement_method        'phi and omega scans'

_diffrn_detector_area_resol_mean  ?

_diffrn_standards_number          ?

_diffrn_standards_interval_count  ?

_diffrn_standards_interval_time   ?

_diffrn_standards_decay_%         ?

_diffrn_reflns_number             6814

_diffrn_reflns_av_R_equivalents   0.0285

_diffrn_reflns_av_sigmaI/netI     0.0379

_diffrn_reflns_limit_h_min        -26

_diffrn_reflns_limit_h_max        25

_diffrn_reflns_limit_k_min        -10

_diffrn_reflns_limit_k_max        10

_diffrn_reflns_limit_l_min        -25

_diffrn_reflns_limit_l_max        22

_diffrn_reflns_theta_min          2.33

_diffrn_reflns_theta_max          28.32

_reflns_number_total              3156

_reflns_number_gt                 2544

_reflns_threshold_expression      >2sigma(I)


_computing_data_collection        'Bruker SMART'

_computing_cell_refinement        'Bruker SMART'

_computing_data_reduction         'Bruker SHELXTL'

_computing_structure_solution     'SHELXS-97 (Sheldrick, 1990)'

_computing_structure_refinement   'SHELXL-97 (Sheldrick, 1997)'

_computing_molecular_graphics     'Bruker SHELXTL'

_computing_publication_material   'Bruker SHELXTL'


_refine_special_details

;

   Refinement of F^2^ against ALL reflections.  The weighted R-factor wR and

   goodness of fit S are based on F^2^, conventional R-factors R are based

   on F, with F set to zero for negative F^2^. The threshold expression of

   F^2^ > 2sigma(F^2^) is used only for calculating R-factors(gt) etc. and is

   not relevant to the choice of reflections for refinement.  R-factors based

   on F^2^ are statistically about twice as large as those based on F, and R-

   factors based on ALL data will be even larger.

;


_refine_ls_structure_factor_coef  Fsqd

_refine_ls_matrix_type            full

_refine_ls_weighting_scheme       calc

_refine_ls_weighting_details

   'calc w=1/[\s^2^(Fo^2^)+(0.0462P)^2^+0.0000P] where P=(Fo^2^+2Fc^2^)/3'

_atom_sites_solution_primary      direct

_atom_sites_solution_secondary    difmap

_atom_sites_solution_hydrogens    geom

_refine_ls_hydrogen_treatment     mixed

_refine_ls_extinction_method      none

_refine_ls_extinction_coef        ?

_refine_ls_number_reflns          3156

_refine_ls_number_parameters      238

_refine_ls_number_restraints      0

_refine_ls_R_factor_all           0.0465

_refine_ls_R_factor_gt            0.0343

_refine_ls_wR_factor_ref          0.0972

_refine_ls_wR_factor_gt           0.0903

_refine_ls_goodness_of_fit_ref    1.178

_refine_ls_restrained_S_all       1.178

_refine_ls_shift/su_max           0.442

_refine_ls_shift/su_mean          0.009


loop_

   _atom_site_label

   _atom_site_type_symbol

   _atom_site_fract_x

   _atom_site_fract_y

   _atom_site_fract_z

   _atom_site_U_iso_or_equiv

   _atom_site_adp_type

   _atom_site_occupancy

   _atom_site_symmetry_multiplicity

   _atom_site_calc_flag

   _atom_site_refinement_flags

   _atom_site_disorder_assembly

   _atom_site_disorder_group

Cu1 Cu 0.5000 0.5000 0.0000 0.03337(13) Uani 1 2 d S . .

B1 B 1.0000 0.0531(4) 0.2500 0.0221(6) Uani 1 2 d S . .

N1 N 0.58535(11) 0.6287(2) 0.05434(10) 0.0337(4) Uani 1 1 d . . .

F1 F 0.92667(7) 0.28307(15) 0.30466(6) 0.0318(3) Uani 1 1 d . . .

F2 F 0.81927(8) 0.50216(15) 0.22431(8) 0.0394(3) Uani 1 1 d . . .

F3 F 0.76236(8) 0.52449(16) 0.06910(8) 0.0425(3) Uani 1 1 d . . .

F4 F 0.81825(7) 0.32541(16) -0.00188(6) 0.0349(3) Uani 1 1 d . . .

F5 F 0.92344(7) 0.10756(15) 0.07478(6) 0.0335(3) Uani 1 1 d . . .

F6 F 0.84426(7) -0.00389(14) 0.25055(7) 0.0322(3) Uani 1 1 d . . .

F7 F 0.81899(7) -0.22829(17) 0.33089(8) 0.0413(3) Uani 1 1 d . . .

F8 F 0.93346(8) -0.43043(18) 0.42601(8) 0.0441(3) Uani 1 1 d . . .

F9 F 1.07596(8) -0.40122(15) 0.43794(7) 0.0382(3) Uani 1 1 d . . .

F10 F 1.10444(7) -0.17586(16) 0.35862(7) 0.0335(3) Uani 1 1 d . . .

C1 C 0.92969(10) 0.1779(2) 0.19472(10) 0.0221(4) Uani 1 1 d . . .

C2 C 0.90052(11) 0.2870(2) 0.22772(11) 0.0246(4) Uani 1 1 d . . .

C3 C 0.84505(11) 0.4019(2) 0.18770(12) 0.0276(4) Uani 1 1 d . . .

C4 C 0.81615(11) 0.4141(3) 0.10974(12) 0.0291(4) Uani 1 1 d . . .

C5 C 0.84400(11) 0.3126(3) 0.07385(11) 0.0261(4) Uani 1 1 d . . .

C6 C 0.89928(11) 0.1983(2) 0.11646(11) 0.0238(4) Uani 1 1 d . . .

C7 C 0.97665(10) -0.0748(2) 0.30055(10) 0.0229(4) Uani 1 1 d . . .

C8 C 0.90543(11) -0.0970(2) 0.29670(10) 0.0246(4) Uani 1 1 d . . .

C9 C 0.88994(11) -0.2145(3) 0.33773(11) 0.0288(4) Uani 1 1 d . . .

C10 C 0.94695(13) -0.3180(3) 0.38532(12) 0.0300(4) Uani 1 1 d . . .

C11 C 1.01892(12) -0.3021(3) 0.39064(11) 0.0280(4) Uani 1 1 d . . .

C12 C 1.03184(11) -0.1846(3) 0.34905(11) 0.0259(4) Uani 1 1 d . . .

C13 C 0.63644(13) 0.7119(3) 0.08570(12) 0.0331(5) Uani 1 1 d . . .

C14 C 0.70218(13) 0.8188(3) 0.12630(15) 0.0437(6) Uani 1 1 d . . .

H14A H 0.6972 0.8754 0.1672 0.066 Uiso 1 1 calc R . .

H14B H 0.7040 0.8984 0.0904 0.066 Uiso 1 1 calc R . .

H14C H 0.7497 0.7546 0.1486 0.066 Uiso 1 1 calc R . .


loop_

   _atom_site_aniso_label

   _atom_site_aniso_U_11

   _atom_site_aniso_U_22

   _atom_site_aniso_U_33

   _atom_site_aniso_U_23

   _atom_site_aniso_U_13

   _atom_site_aniso_U_12

Cu1 0.0360(2) 0.0353(2) 0.0312(2) -0.00198(15) 0.01785(16) -0.00321(16)

B1 0.0220(14) 0.0239(16) 0.0219(14) 0.000 0.0115(12) 0.000

N1 0.0379(10) 0.0354(11) 0.0300(9) -0.0001(7) 0.0179(8) 0.0004(8)

F1 0.0353(6) 0.0373(7) 0.0238(6) -0.0034(5) 0.0148(5) 0.0036(5)

F2 0.0432(8) 0.0345(8) 0.0435(7) -0.0068(5) 0.0230(6) 0.0113(6)

F3 0.0389(7) 0.0359(8) 0.0432(8) 0.0067(6) 0.0116(6) 0.0169(6)

F4 0.0353(7) 0.0391(8) 0.0234(6) 0.0048(5) 0.0082(5) 0.0038(5)

F5 0.0386(7) 0.0389(8) 0.0261(6) 0.0006(5) 0.0177(5) 0.0118(6)

F6 0.0212(6) 0.0361(8) 0.0366(7) 0.0066(5) 0.0113(5) 0.0002(5)

F7 0.0302(7) 0.0501(9) 0.0475(8) 0.0048(6) 0.0217(6) -0.0098(6)

F8 0.0542(8) 0.0363(8) 0.0474(8) 0.0116(6) 0.0287(7) -0.0080(6)

F9 0.0465(7) 0.0301(7) 0.0381(7) 0.0106(5) 0.0201(6) 0.0132(6)

F10 0.0247(6) 0.0394(8) 0.0377(7) 0.0089(5) 0.0158(5) 0.0072(5)

C1 0.0204(9) 0.0211(10) 0.0257(9) -0.0019(7) 0.0115(7) -0.0032(7)

C2 0.0252(9) 0.0260(11) 0.0234(9) -0.0016(7) 0.0123(8) -0.0036(8)

C3 0.0281(10) 0.0219(11) 0.0356(11) -0.0054(8) 0.0172(8) 0.0000(8)

C4 0.0237(9) 0.0236(11) 0.0357(11) 0.0020(8) 0.0106(8) 0.0030(8)

C5 0.0258(9) 0.0278(11) 0.0220(9) 0.0022(7) 0.0091(8) -0.0013(8)

C6 0.0236(9) 0.0235(10) 0.0255(9) -0.0031(7) 0.0125(8) -0.0011(8)

C7 0.0255(9) 0.0212(10) 0.0217(9) -0.0021(7) 0.0109(8) -0.0018(8)

C8 0.0234(9) 0.0248(11) 0.0239(9) -0.0022(7) 0.0099(8) -0.0014(8)

C9 0.0284(10) 0.0303(12) 0.0303(10) -0.0048(8) 0.0161(8) -0.0086(8)

C10 0.0405(11) 0.0233(11) 0.0288(10) -0.0008(8) 0.0186(9) -0.0065(9)

C11 0.0335(11) 0.0234(11) 0.0254(9) -0.0001(7) 0.0126(8) 0.0026(8)

C12 0.0245(9) 0.0272(11) 0.0277(9) -0.0021(8) 0.0138(8) 0.0004(8)

C13 0.0358(12) 0.0342(12) 0.0286(10) 0.0004(9) 0.0147(9) 0.0068(10)

C14 0.0325(12) 0.0390(14) 0.0493(14) -0.0094(11) 0.0110(10) 0.0012(10)


_geom_special_details

;

   All esds (except the esd in the dihedral angle between two l.s. planes)

   are estimated using the full covariance matrix.  The cell esds are taken

   into account individually in the estimation of esds in distances, angles

   and torsion angles; correlations between esds in cell parameters are only

   used when they are defined by crystal symmetry.  An approximate (isotropic)

   treatment of cell esds is used for estimating esds involving l.s. planes.

;


loop_

   _geom_bond_atom_site_label_1

   _geom_bond_atom_site_label_2

   _geom_bond_distance

   _geom_bond_site_symmetry_2

   _geom_bond_publ_flag

Cu1 N1 1.8443(19) 5_665 ?

Cu1 N1 1.8443(19) . ?

B1 C1 1.656(3) 2_755 ?

B1 C1 1.656(3) . ?

B1 C7 1.662(3) 2_755 ?

B1 C7 1.662(3) . ?

N1 C13 1.131(3) . ?

F1 C2 1.358(2) . ?

F2 C3 1.348(2) . ?

F3 C4 1.339(2) . ?

F4 C5 1.341(2) . ?

F5 C6 1.357(2) . ?

F6 C8 1.355(2) . ?

F7 C9 1.345(2) . ?

F8 C10 1.335(2) . ?

F9 C11 1.346(2) . ?

F10 C12 1.354(2) . ?

C1 C6 1.382(3) . ?

C1 C2 1.387(3) . ?

C2 C3 1.379(3) . ?

C3 C4 1.373(3) . ?

C4 C5 1.370(3) . ?

C5 C6 1.384(3) . ?

C7 C8 1.382(3) . ?

C7 C12 1.391(3) . ?

C8 C9 1.388(3) . ?

C9 C10 1.370(3) . ?

C10 C11 1.379(3) . ?

C11 C12 1.371(3) . ?

C13 C14 1.455(3) . ?

 

loop_

   _geom_angle_atom_site_label_1

   _geom_angle_atom_site_label_2

   _geom_angle_atom_site_label_3

   _geom_angle

   _geom_angle_site_symmetry_1

   _geom_angle_site_symmetry_3

   _geom_angle_publ_flag

N1 Cu1 N1 180.00(19) 5_665 . ?

C1 B1 C1 103.2(2) 2_755 . ?

C1 B1 C7 114.11(9) 2_755 2_755 ?

C1 B1 C7 112.33(9) . 2_755 ?

C1 B1 C7 112.33(9) 2_755 . ?

C1 B1 C7 114.11(9) . . ?

C7 B1 C7 101.2(2) 2_755 . ?

C13 N1 Cu1 177.5(2) . . ?

C6 C1 C2 113.12(17) . . ?

C6 C1 B1 126.89(15) . . ?

C2 C1 B1 119.72(15) . . ?

F1 C2 C3 115.97(17) . . ?

F1 C2 C1 119.41(17) . . ?

C3 C2 C1 124.61(18) . . ?

F2 C3 C4 119.90(18) . . ?

F2 C3 C2 120.71(18) . . ?

C4 C3 C2 119.39(18) . . ?

F3 C4 C5 120.09(18) . . ?

F3 C4 C3 120.98(18) . . ?

C5 C4 C3 118.93(18) . . ?

F4 C5 C4 119.99(17) . . ?

F4 C5 C6 120.48(18) . . ?

C4 C5 C6 119.52(18) . . ?

F5 C6 C1 121.61(17) . . ?

F5 C6 C5 113.98(16) . . ?

C1 C6 C5 124.40(18) . . ?

C8 C7 C12 113.20(18) . . ?

C8 C7 B1 127.95(16) . . ?

C12 C7 B1 118.64(15) . . ?

F6 C8 C7 121.24(17) . . ?

F6 C8 C9 114.72(17) . . ?

C7 C8 C9 124.03(18) . . ?

F7 C9 C10 119.49(19) . . ?

F7 C9 C8 120.43(19) . . ?

C10 C9 C8 120.08(19) . . ?

F8 C10 C9 120.96(19) . . ?

F8 C10 C11 120.82(19) . . ?

C9 C10 C11 118.21(19) . . ?

F9 C11 C12 121.01(18) . . ?

F9 C11 C10 119.06(19) . . ?

C12 C11 C10 119.92(19) . . ?

F10 C12 C11 115.99(17) . . ?

F10 C12 C7 119.43(17) . . ?

C11 C12 C7 124.55(18) . . ?

N1 C13 C14 179.8(3) . . ?


_diffrn_measured_fraction_theta_max    0.894

_diffrn_reflns_theta_full              28.32

_diffrn_measured_fraction_theta_full   0.894

_refine_diff_density_max    0.301

_refine_diff_density_min   -0.411

_refine_diff_density_rms    0.058


#===END
